# Supplementary material
Source: PubMed Central journal article supplement (PMC4655744)
Supplement: supp_kwv181_kwv181supp.pdf [file supp_kwv181_kwv181supp.pdf]

## **WEB APPENDIX 1**

### ***Retention Measures***

Whether measured by laboratory collection surrogates or by clinical encounters themselves, retention in clinical care has been defined in the IOM recommendations as 2 visits within a 12-month period (>90 days apart).<sup>(1)</sup> To assess concordance between definitions of retention based on laboratory measures vs. those based on clinic encounters, one can use elapsed time since patient entry to care (and subsequently anchor to calendar time, a hybrid of assessment on two time axes) to define retention. Using the hybrid method, a patient may fulfill criteria for retention in a calendar period based on clinic encounters alone, based on laboratory measures alone, based on both, or may not qualify as retained in care by either laboratory measure or encounters. Further, a patient may have more laboratory measures than encounters, more encounters than laboratory measures, or the same number of each in a given period (Web Figure 1).

**Web Figure 1.** Conceptual framework for continuity and retention in clinical care over time by calendar periods, as defined by laboratory measures or clinical encounters, illustrated for two hypothetical patients “A” and “B”.

|                                | 2008                 |                      |                      |                      | 2009                 |                      |                      |                      | 2010                 |                      |                      |                      |
|--------------------------------|----------------------|----------------------|----------------------|----------------------|----------------------|----------------------|----------------------|----------------------|----------------------|----------------------|----------------------|----------------------|
|                                | 1 <sup>st</sup> Qtr. | 2 <sup>nd</sup> Qtr. | 3 <sup>rd</sup> Qtr. | 4 <sup>th</sup> Qtr. | 1 <sup>st</sup> Qtr. | 2 <sup>nd</sup> Qtr. | 3 <sup>rd</sup> Qtr. | 4 <sup>th</sup> Qtr. | 1 <sup>st</sup> Qtr. | 2 <sup>nd</sup> Qtr. | 3 <sup>rd</sup> Qtr. | 4 <sup>th</sup> Qtr. |
| Patient A: Clinical Encounters | ⊙                    |                      | ✓                    |                      | ✓                    |                      | ✓                    |                      | ✓                    |                      | ✓                    |                      |
| Patient A: Laboratory Measures | ⊙                    |                      | ✓                    |                      | X                    |                      |                      |                      |                      | X                    |                      |                      |
| Patient B: Clinical Encounters |                      |                      | ⊙                    |                      |                      |                      | ✓                    | ✓                    |                      |                      |                      | X                    |
| Patient B: Laboratory Measures |                      |                      | ⊙                    |                      |                      | ✓                    |                      | ✓                    | ✓                    |                      | ✓                    |                      |

IOM: Institute of Medicine

⊙ : Initial encounter in clinical care in NA-ACCORD

✓ : Encounter or Lab that contributes to retention by IOM indicator (≥2 encounters/labs within 1 year, >90 days apart)

X : Encounter or Lab that does *not* contribute to retention by IOM indicator

■ (Green) : Calendar year in which patient is “Retained” by IOM indicator

■ (Red) : Calendar year in which patient is “Not Retained” by IOM indicator

## WEB APPENDIX 2

### *Selection of Toeplitz Correlation Structure in the GEE Context*

The concordance of two longitudinal binary measures can be modeled as odds ratios using estimating equations that properly account for within-individual clustering of outcomes.<sup>(2)</sup>

Further, the lorelogram, defined as  $LOR(t_j, t_k) = \log OR(Y_{ij}, Y_{ik})$   
 $LOR(t_j, t_k) = \log OR(Y_{ij}, Y_{ik})$ , can be used to quantify the degree of within-individual clustering, and when applied to the recurrence of  $R_{EB}$  over time, it is clear that an independence correlation structure within the GEE is inappropriate (Web Figure 2).<sup>(3)</sup>

With that understanding, the marginal model diagnostics and associated covariance/correlation structures are explained further below.

The quasi-likelihood information criterion (QIC), Copula information criterion (CIC), area under the receiver operating characteristic curve (c-statistic), and variance differences between the model-based and sandwich estimators can be used to assess which of the models incorporating the various correlation structures is closest to the true model and which produces the most accurate predictions.<sup>(4,5,6,7)</sup> These diagnostics, with the exception of the QIC, generally indicated in this analysis that the Toeplitz correlation structure was superior to the independence, exchangeable, AR1, and unstructured structures (Web Figure 3, Web Table 1).

**Web Figure 2.** Lorelogram of encounter-based retention ( $R_{EB}$ ) for 10,523 individuals with observations present over the entire 11-year study period, showing the within-individual correlation of  $R_{EB}$  over time.

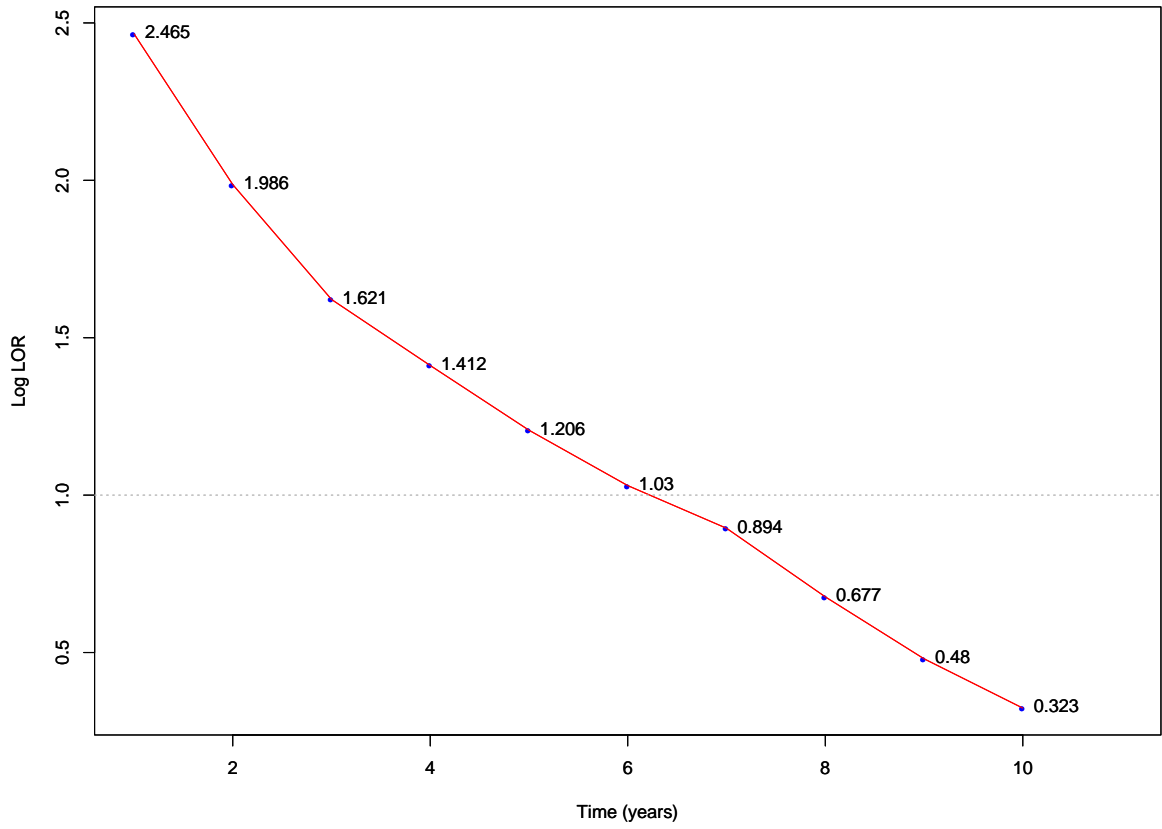

**Web Figure 3.** Lower diagonals of the empirical **a)** exchangeable, **b)** AR1, **c)** unstructured, and **d)** Toeplitz correlation matrices derived from models of  $R_{EB}$  predicted by  $R_{LB}$ . The Toeplitz bands are the means of the unstructured matrix.

**a.**

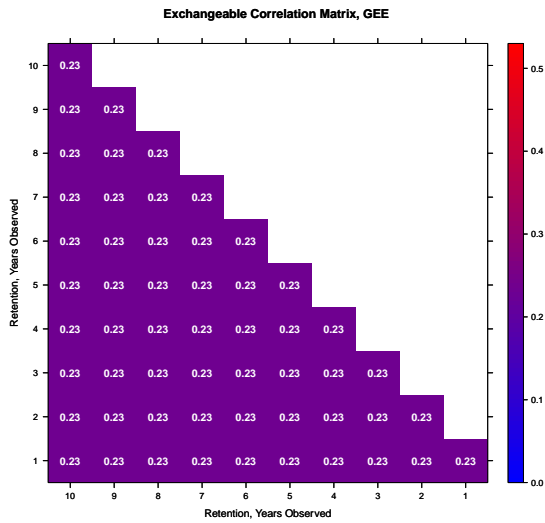

**b.**

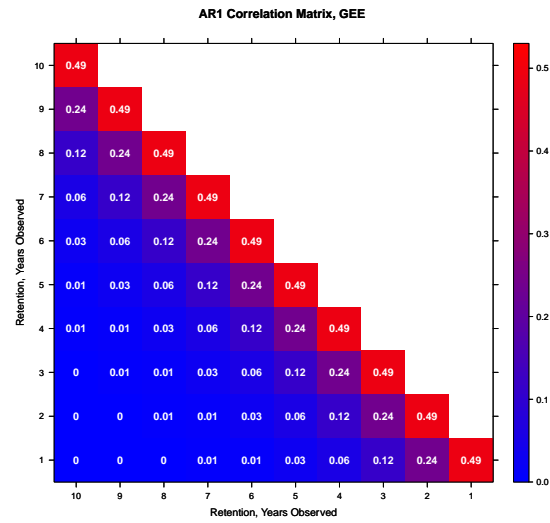

**c.**

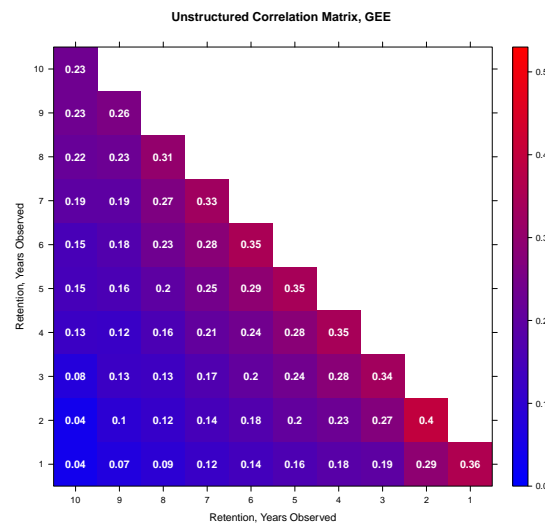

**d.**

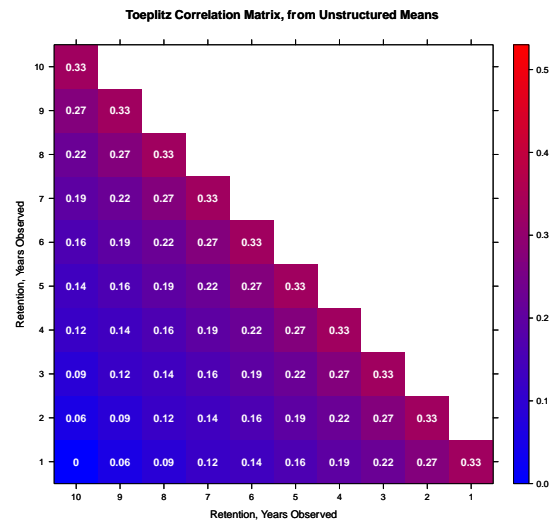

**Web Table 1.** Model diagnostics for different correlation structures used to model  $R_{EB}$  based on  $R_{LB}$ . Adjusted models account for age, sex, race, HIV risk factor, and cohort site. QIC is the quasi-likelihood information criterion of Pan. CIC is the Copula Information Criterion. AUC is the area under the receiver operating characteristic curve (C statistic).

| <b>Criterion</b>                                                  | <b>Exchangeable<br/>Correlation Structure</b> | <b>AR1 Correlation<br/>Structure</b> | <b>Unstructured<br/>Correlation Structure</b> | <b>Toeplitz Correlation<br/>Structure</b> |
|-------------------------------------------------------------------|-----------------------------------------------|--------------------------------------|-----------------------------------------------|-------------------------------------------|
| Difference between sandwich and model-based variance (unadjusted) | 0.000096                                      | 0.000125                             | 0.0000888                                     | 0.0000886                                 |
| Difference between sandwich and model-based variance (adjusted)   | 0.000189                                      | 0.000198                             | 0.000170                                      | 0.000170                                  |
| QIC (unadjusted)                                                  | 406,961                                       | 408,526                              | 407,546                                       | 407,579                                   |
| QIC (adjusted)                                                    | 406,812                                       | 407,748                              | 407,177                                       | 407,206                                   |
| CIC (unadjusted)                                                  | 3.6                                           | 3.55                                 | 3.45                                          | 3.44                                      |
| CIC (adjusted)                                                    | 4.43                                          | 4.25                                 | 4.15                                          | 4.15                                      |
| AUC for ROC of unadjusted models                                  | 0.805                                         | 0.805                                | 0.805                                         | 0.805                                     |
| AUC unadjusted model, 2000-2003                                   |                                               |                                      |                                               | 0.800                                     |
| AUC unadjusted model, 2004-2007                                   |                                               |                                      |                                               | 0.805                                     |
| AUC unadjusted model, 2008-2010                                   |                                               |                                      |                                               | 0.808                                     |

  

| <b>Factor</b>                | <b>Exchangeable<br/>Correlation Structure</b> | <b>AR1 Correlation<br/>Structure</b> | <b>Unstructured<br/>Correlation Structure</b> | <b>Toeplitz Correlation<br/>Structure</b> |
|------------------------------|-----------------------------------------------|--------------------------------------|-----------------------------------------------|-------------------------------------------|
| Retention by lab             | 15.43                                         | 13.27                                | 14.38                                         | 14.34                                     |
| Year of care                 | 1.04                                          | 1.04                                 | 1.04                                          | 1.04                                      |
| Interaction of lab with year | 1.03                                          | 1.02                                 | 1.03                                          | 1.03                                      |

### WEB APPENDIX 3

#### *Distribution of Stabilized Inverse Probability of Selection Weights Over Time*

The untruncated and truncated distribution of weights over the study period accounting for site alone and for all available confounders are illustrated below (Web Figure 4).

The truncated weights based on site alone (excluding age, sex, race, and risk factor as potential confounders) had a median of 0.93 (interquartile range of 0.71-1.17) and a range of 0.25-2.62 (indicating a lack of extreme values which might lead to unstable effect estimates). The truncated weights based on all potential confounding factors available had a median of 0.93 (interquartile range of 0.66-1.16) and a range of 0.21-2.72.

Using these weights, the regression of  $R_{EB}$  on  $R_{LB}$  with GEE was conducted (as outlined above) to adjust for the potential confounding factors and account for clustering of outcomes within individuals.

**Web Figure 4.** Distribution of constructed IPW for the probability of  $R_{LB}$ , both untruncated and truncated at the 5th and 95th percentiles, **a)** based on clinic site alone and **b)** based on clinic site, age, sex, race/ethnicity, and HIV risk factor.

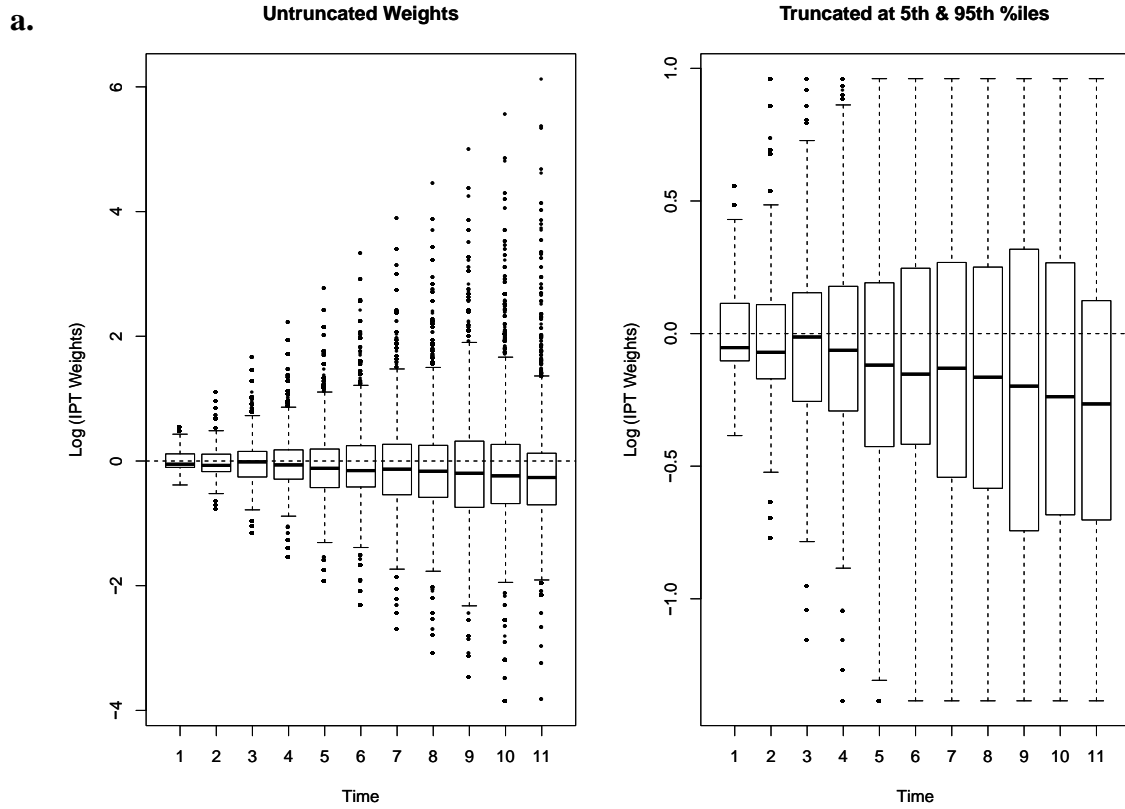



b.

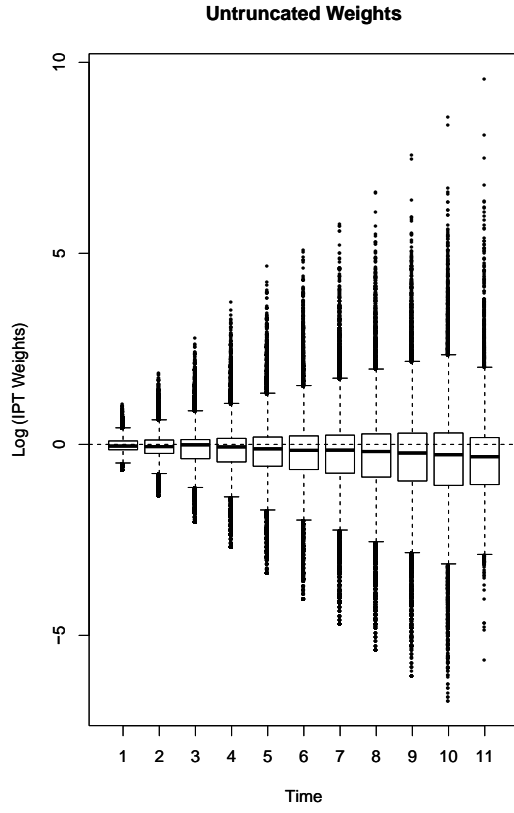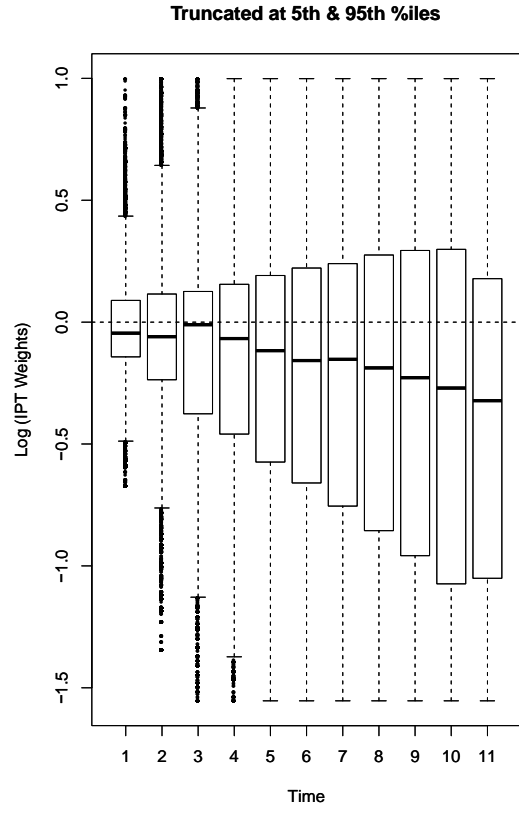

## Web References

1. Ford MA, Spicer CM. Monitoring HIV care in the United States: indicators and data systems. Washington, DC: National Academies Press; 2012.
2. Yan J, Fine J. Estimating equations for association structures. *Stat Med*. 2004;23(6): 859–874.
3. Heagerty PJ, Zeger SL. Lorelogram: a regression approach to exploring dependence in longitudinal categorical responses. *JAMA*. 1998;93(441):150–162.
4. Liang K-Y, Zeger SL. Longitudinal data analysis using generalized linear models. *Biometrika*. 1986;73:13–22.
5. Harrell FE. Regression modeling strategies : with applications to linear models, logistic regression, and survival analysis. New York: Springer; 2001.
6. Grønneberg S, Hjort NL. The copula information criteria. *Scand J Stat*. 2014;41(2): 436–459.
7. Pan W. Akaike’s Information Criterion in generalized estimating equations. *Biometrics*. 2001;57(1):120–125.
